1           **Strand-wise and bait-assisted assembly of nearly-full *rrn***  
2           **operons applied to assess species engraftment after faecal**  
3           **microbiota transplantation**

4           Alfonso Benítez-Páez<sup>1,2\*</sup>, Annick V. Hartstra<sup>3</sup>, Max Nieuwdorp<sup>3</sup>, Yolanda Sanz<sup>1\*</sup>

5

6           1 Microbial Ecology, Nutrition & Health Research Unit. Institute of Agrochemistry and Food  
7           Technology, Spanish National Research Council (IATA-CSIC). 46980 Paterna-Valencia, Spain.

8           2 Host-Microbe Interactions in Metabolic Health laboratory. Príncipe Felipe Research Centre  
9           (CIPF). 46012 Valencia, Spain.

10          3 Department of Internal and Vascular Medicine, Amsterdam University Medical Centres. 1105 AZ  
11          Amsterdam, The Netherlands.

12

13          Running title: *rrn* operon sequencing for assessing species engraftment

14          \* To whom any correspondence should be addressed: ABP E-mail [abenitez@cipf.es](mailto:abenitez@cipf.es), YS E-mail  
15          [yolsanz@iata.csic.es](mailto:yolsanz@iata.csic.es).

16

17

## 18 **Abstract**

19 **Background.** Effective methodologies to accurately identify members of the gut microbiota at the  
20 species and strain levels are necessary to unveiling more specific and detailed host-microbe  
21 interactions and associations with health and disease.

22 **Methods.** MinION™ MkIb nanopore-based device and the R9.5 flowcell chemistry were used to  
23 sequence and assemble dozens of *rrn* regions (16S-ITS-23S) derived from the most prevalent  
24 bacterial species in the human gut microbiota. As a method proof-of-concept to disclose further  
25 strain-level variation, we performed a complementary analysis in a subset of samples derived from  
26 an faecal microbiota transplantation (FMT) trial aiming amelioration of glucose and lipid  
27 metabolism in overweight subjects with metabolic syndrome.

28 **Results.** The resulting updated *rrn* database, the data processing pipeline, and the precise control of  
29 covariates (sequencing run, sex, age, BMI, donor) were pivotal to accurately estimate the changes in  
30 gut microbial species abundance in the recipients after FMT. Furthermore, the *rrn* methodology  
31 described here demonstrated the ability to detect strain-level variation, critical to evaluate the  
32 transference of bacteria from donors to recipients as a consequence of the FMT. At this regard, we  
33 showed that our FMT trial successfully induced donors' strain engraftment of e.g. *Parabacteroides*  
34 *merdae* species in recipients by mapping and assessing their associated single nucleotide variants  
35 (SNV).

36 **Conclusions.** We developed a methodology that enables the identification of microbiota at species-  
37 and strain-level in a cost-effective manner. Despite its error-prone nature and its modest per-base  
38 accuracy, the nanopore data showed to have enough quality to estimate single-nucleotide variation.  
39 This methodology and data analysis represents a cost-effective manner to trace genetic variability  
40 needed for better understanding the health effects of the human microbiome.

41 ***Trial registration.*** The study was prospectively registered at the Dutch Trial registry - NTR4488

42 (<https://www.trialregister.nl/trial/4488>).

43 **Keywords:** nanopore sequencing, MinION, gut microbiota, faecal microbiota transplantation,

44 single nucleotide variation, species-level resolution, *rrn* operon.

## 45 **Background**

46 Studying complex human-associated microbial communities demands the development of cost-  
47 effective sequencing strategies providing informative DNA pieces and high coverage outputs, thus  
48 permitting to discern the specific species or strains inhabiting an ecosystem. Metagenomics based  
49 on DNA shotgun sequencing is, up to date, the only strategy that enable us to reach such a  
50 resolution level, but it is still highly expensive. This makes it unaffordable for most of the studies  
51 aiming to define microbiota features associated with health or disease including large number of  
52 samples to minimize the noise introduced by other covariates that contribute to the high inter-  
53 individual variability of the microbiota. As a consequence, most of the microbiome analyses have  
54 been performed through targeted amplification of universal gene markers, mainly few hypervariable  
55 regions (e.g. V3 and/or V4) of the bacterial 16S rRNA gene. This protocol shows limitations since  
56 it only allows to capture changes affecting the global microbiome structure but does not permit  
57 precise taxonomic identifications at the species levels, mostly because of the limited resolution of  
58 this gene marker among closely related species. We have developed a nanopore-based sequencing  
59 method to improve the resolution of taxonomy identifications by studying the microbial genetic  
60 variability of the nearly-full 16S rRNA gene previously [1]. This approach has also demonstrated to  
61 perform well in a wide variety of microbiota inventories [2-5]. More recently, we have also  
62 pioneered a new methodology combining the sequencing of an extremely variable multi-locus  
63 region with sample multiplexing [6] for improving the species-level characterisation of complex  
64 microbial communities [2, 7]. Despite the promising performance of the *rrn* region for microbial  
65 species identification, one of the main pitfalls of this methodology is the lack of a reference  
66 database to compare the long-reads generated from nanopore-based devices. In this regard, we have  
67 made a great effort to compile a vast amount of genetic information of *rrn* sequences from  
68 thousands of bacterial species [6]. Nonetheless, the limited amount of properly annotated DNA  
69 sequences available in public repositories of bacteria from multiple ecosystems will restrict the

70 utilisation of this approach for less explored habitats [2, 8]. Moreover, recent studies indicate that  
71 the architecture of the *rrn* region is not equally conserved in all bacteria; thus, microbial  
72 communities enriched in Deinococcus-Thermus, Chloroflexi, Planctomycetes phyla might be  
73 difficult to be studied by such pipeline [9]. Anyhow, the utility of the *rrn* to survey the biological  
74 diversity has been explored across-kingdoms, showing promising results also for the identification  
75 of metazoans by metabarcoding approaches [10].

76 Although the issues concerning unlinked 16S rRNA and 23S rRNA markers can be addressed, in  
77 certain bacteria groups and environmental samples, through the study of individual regions, the  
78 database completeness and proper annotation are pivotal for the complete implementation of this  
79 molecular appraisal. For that reason in this study, we aimed to perform a bait-assisted assembly of  
80 the nearly-full *rrn* regions of the human intestinal microbiota by using nanopore-based sequencing.  
81 Therefore, we provided *de novo* information of the *rrn* region of microorganisms from the human  
82 gut, one of the environments most extendedly investigated, enriching the *rrn* database with  
83 annotation of dozens of microbial species and strains. As a proof of concept of the utility of this  
84 methodology we have estimated the changes in the gut microbiota, at the species-level, as a  
85 consequence of a faecal microbiota transplantation (FMT) intervention in humans, using the  
86 updated *rrn* database. Furthermore, we have explored the potential of this approach to unveil the  
87 strain-level variation to track species engraftment after FMT.

## 88 **Methods**

### 89 *Subjects, samples, and clinical data*

90 Samples were obtained upon informed consent from a previous FMT clinical trial carried out in the  
91 frame of the MyNewGut project. The details of the study design are publicly available elsewhere  
92 [11]. Briefly, a total of twenty-four faecal samples were analysed in the present study. Twenty  
93 samples were obtained from 10 recipients involved in the allogenic FMT, who provided one sample

94 before (PRE-FMT faecal samples) and 4 weeks after (POST-FMT faecal samples) the intervention.

95 The samples of 4 donors were also analysed and the effect of this variable in the recipients was

96 considered in the data analysis. This subset of samples was mainly assessed to explore the

97 differential species engraftment in multiple FMT recipients with common donors.

#### 98 *DNA extraction, multi-locus amplification, and sequencing*

99 Microbial DNA was recovered from 100 mg faeces by using the QIAamp® Fast DNA Stool Mini kit

100 (Qiagen, Hilden, Germany) according to manufacturer's instructions and omitting cell disruption by

101 mechanical methods (bead-beating) to preserve DNA with high molecular weight. The *rrn* region

102 comprising the nearly-full bacterial RNA ribosomal operon (16S, ITS, and 23S) was amplified as

103 previously published [6]. Dual-barcoded purified PCR products were mixed in equimolar

104 proportions before sequencing library preparation. In total, three different libraries were prepared

105 from ~1 ug mixed amplicon DNA (containing 7, 8, and 10 barcoded samples, respectively) using

106 the SQK-LSK108 sequencing kit (Oxford Nanopore Technologies, Oxford, UK) following the

107 manufacturer's instructions to produce 1D reads. Each library was individually loaded into

108 respective FLO-MIN107 (R9.5) flowcells (Oxford Nanopore Technologies, Oxford, UK) and

109 sequencing was carried out in the portable sequencer MinION™ MkIb (Oxford Nanopore

110 Technologies, Oxford, UK) operated with *MINKNOW* v1.10.23 software (Oxford Nanopore

111 Technologies, Oxford, UK). Flowcells were primed according to manufacturer instructions, and

112 then a ~18h run of 1D sequencing was executed for each library and flowcell, respectively.

#### 113 *Data pre-processing*

114 Fast5 files were processed with the *albacore* v2.1.3 basecaller and *fasta* files were retrieved for

115 downstream analyses. The barcode and primer (forward or reverse) sequence information was used

116 for demultiplexing into the DNA reads generated from forward and reverse primers according to

117 previous procedures [6]. A size filtering step was configured to retain those reads with at least 1,500

118 nt in length. Barcode and primer sequences were then removed by trimming 50 nucleotides at 5' end  
119 of forward and reverse reads.

### 120 *Bait-assisted rrn assembly*

121 The study design and the assembly of *rrn* is graphically explained in [Figure 1](#) and performed in  
122 different steps as follows:

- 123 • reads from all the 24 samples were merged respectively into forward and reverse subsets.
- 124 • forward read binning into precise microbial species by using competitive alignment against  
125 the non-redundant 16S NCBI database (release January 2018). The *LAST* aligner [12] with -  
126 s 2 -q 1 -b 1 -Q 0 -a 1 -r 1 configuration was used for such aim. Alignment score was the  
127 main criterion to select top-hits. In case of multiple hits with same top score, the alignment  
128 was discarded for downstream processing. The sequence identity (sequence identity above  
129 the 33th percentile  $\geq 85\%$  ) and length information (alignments  $\geq 1500$  nt) were used to  
130 retaining high-quality alignments.
- 131 • a maximum of 500 forward reads per species (randomly shuffled), producing high-quality  
132 alignments, were selected, aligned through iterative refinement methods implemented in  
133 *MAFFT* v7.310 and default parameters [13], and then consensus sequenced obtained by  
134 using *hmmbuild* and *hmmemit* algorithms implemented in *HMMER3* [14]. No significant  
135 improvements on consensus *rrn* were obtained using more than 500 sequences per species.
- 136 • consensus sequences were annotated according to NCBI taxonomy and used as reference to  
137 binning reverse reads in similar manner as made for forward reads. The thresholds for  
138 selection of high-quality alignments based on reverse reads and preliminary assemble of *rrn*  
139 regions were 85% sequence identity (upper 45th percentile) and  $\geq 3500$  nt in length.
- 140 • reverse reads were compared against the consensus sequences obtained from forward reads  
141 assemblies and binned into respective species according to the NCBI taxonomy annotation.  
142 A maximum of 500 reverse reads per species (randomly shuffled), producing high-quality

143 alignments, were selected, merged with maximum 500 forward reads assigned reciprocally  
144 to same species (randomly shuffled), aligned through iterative refinement methods  
145 implemented in *MAFFT*, and then a new consensus sequenced was obtained by using  
146 *hmmbuild* and *hmmemit* algorithms implemented in *HMMER3*.

147 • final consensus sequences were annotated according to concordant NCBI taxonomy,  
148 obtained from forward and reverse reads, and used as a reference to study abundance and  
149 prevalence of gut microbiota at the species level.

150 • a blast-based search of *rrn* assemblies against then non-redundant nucleotide and reference  
151 16S NCBI databases was accomplished to evaluate the identity of the operons  
152 reconstructed. Similarly, annotation of *rrn* assemblies was evaluated against the SILVA  
153 database [15] through SINA aligner [16]. Top hit selection was based on the taxonomy  
154 score,  $TS = \text{Log}_{10}[\text{alignment score} * \text{sequence identity} * \text{alignment length}]$ .

#### 155 *Long-read mapping and variant calling*

156 The *rrn* database [6] was updated with more than two-hundred new *rrn* operon sequences  
157 assembled in this study (labeled as operONT) and re-annotated to different taxonomy levels  
158 according to the NCBI taxonomy database. The mapping of sample reads was performed against the  
159 *rrn\_Dbv2* by competitive alignment using *LAST* aligner similarly as above stated. Taxonomy  
160 assignment was based on best hit retrieved by calculation of TS (see above) and reliable taxonomy  
161 assignments were filtered to those based on alignments with at least 85% sequence identity and  
162 longer than 1500 nt. Species read counts were normalised, and a covariate-controlling linear mixed  
163 models based method was used to explore the differential abundance of taxonomy features between  
164 conditions as stated in the next paragraph. The species engraftment was evaluated by a selection of  
165 all sample reads mapped to the *Parabacteroides merdae* and *Faecalibacterium prausnitzii* species.  
166 To detect informative sites, based on single nucleotide variants probably linked to strain variation,  
167 we firstly proceed to map all selected reads to the respective reference *rrn* using *LAST* aligner and



168 the parameters set across this study (see *rrn* assembly). The *maf-convert* algorithm (*LAST* aligner  
169 toolkit) was used to create respective *sam* files. The algorithms compiled into *samtools* v1.3.1 were  
170 used to index, order, and pileup reads as well as retrieving the information regarding to the  
171 nucleotide frequency per site and coverage (*vcf* files). The site selection was based on positions of  
172 *rrn* with the lowest frequency of the dominant allele, without reductions in the coverage (>75% of  
173 the relative coverage), thus obtaining sites with a balanced representation of at least the two most  
174 predominant alleles. Secondly, the samples reads mapped to the reference species were individually  
175 assessed to detect meaningful changes between recipients' PRE-FMT and POST-FMT in intestinal  
176 bacterial genotypes. Changes in nucleotide frequencies per SNV site were assessed by calculating  
177 the Bray-Curtis dissimilarity index between pairs of POST-FMT samples and PRE-FMT or  
178 respective donor samples following statistical evaluation by using Wilcoxon signed rank test for  
179 paired samples.

#### 180 *Sanger sequencing and validation of Parabacteroides merdae SNVs*

181 The reference *rrn* from *P. merdae* was submitted to the Primer-Blast web server  
182 (<https://www.ncbi.nlm.nih.gov/tools/primer-blast/>) to retrieve specific primer pairs to amplify  
183 selectively this *rrn* and primers flanking the SNV-743, SNV-1975, and SNV-3016 for Sanger  
184 sequencing. The comparison against the non-redundant NCBI database and *Parabacteroides*  
185 [taxid:375288] as reference organism were fixed as checking parameters for primer prediction. The  
186 *rrn* region from *P. merdae* was amplified by 28-PCR cycles, including the following stages: 95°C  
187 for 20 s, 61°C for 30 s, and 72°C for 150 s. Phusion High-Fidelity Taq Polymerase (Thermo  
188 Scientific) and the pm485 (TTTCGCACAGCCATGTGTTTTGTT) and pm3647  
189 (TGCCGTTGAAACTGGGTTACTTGA) primer pair, were used in the amplification reaction. PCR  
190 products were cleaned with Illustra GFX PCR DNA and gel band purification kit (GE Healthcare,  
191 Chicago, IL, USA) and sequenced in by Sanger technology in an ABI 3730XL sequencer (STAB-  
192 VIDA, Caparica, Portugal) using the described primers above (pm485 and pm3647), additionally to

193 the primers pm1584 (TTCGCGTCTACTCACTCCGACTAT) and pm2415  
194 (ACCCCTTACGGAGTTTATCGTGGA). The sequencing electropherograms from *abl* files were  
195 visualised with FinchTV v1.4.0 (Geospiza Inc.).

#### 196 *Diversity and taxonomic analyses at the species level*

197 Prevalence and abundance of a total of 2,519 species contained in the database was evaluated, and  
198 diversity analyses were completed taking into account the species with > 0.01% of relative  
199 abundance on average (~250 species in total). Alpha diversity descriptors such as Chao's index,  
200 Shannon's entropy, Simpson's reciprocal index, and dominance were obtained by using *qiime*  
201 v1.9.1 [17]. Similarly, *qiime* was used to calculate Bray-Curtis dissimilarity index among samples  
202 and to perform multivariate exploratory (Principal Coordinate Analysis - PCoA) and statistical  
203 (PERMANOVA) analyses. A linear mixed model (LMM - *nlme* R package) analysis was also  
204 conducted on log-transformed and normalised data to detect differential features in the microbiota  
205 before and after the intervention. Inherent variation due to individual features was set as a random  
206 effect for each variable analysed (fixed effect). The possible covariates of the clinical and faecal  
207 microbiota that showed differences between the study groups (p-value  $\leq$  0.05) were selected.  
208 Recognised covariates of microbiota such as age, sex, baseline BMI, and sequencing batch were  
209 identified as significant in this study as well and, also, included as random effects in the LMM. To  
210 identify microbial species potentially linked to clinical variables altered as a consequence of the  
211 FMT the Kendall's  $\tau$  (tau) between variable-pairs was estimated and corrected for multiple testing,  
212 using false discovery rate (FDR) approach. Associations were selected when FDR p-value  $\leq$  0.1.  
213 Graphics were performed on R v3.6 using *ggplot2* and *ggridges* packages.

## 214 **Results**

### 215 *Assembly and taxonomic identification of human gut microbiota-derived rrn sequences*

216 We retrieved a total of ~516k reads after base calling from three MinION™/R9.5 sequencing runs,  
217 ~430k reads after size trimming (83.3% retained), and ~427k reads successfully demultiplexed  
218 (82.7%). The number of the forward and reverse reads obtained after demultiplexing was 210,736  
219 and 216,617 (0.49 and 0.51 proportions), respectively. During the first step of the bait-based *rrn*  
220 assembly (Figure 1), based on mapping of forward reads against the non-redundant NCBI 16S  
221 database and selection of high-quality alignments, we detected the presence of 381 different  
222 species. However, the preliminary *rrn* assembly was initiated only for those species with at least 5X  
223 coverage, 250 in total. The mapping of reverse reads against the preliminary *rrn* assemblies  
224 permitted to confirm the detection of 229 microbial species. Figure S1 shows the initial assessment  
225 of alignments produced from forward and reverse reads according to different sequencing batches  
226 of our study. Additionally, the high-quality alignments (see methods) resulting from mapping  
227 forward and reverse reads against respective reference databases were evaluated to determine  
228 mismatch and indels proportions in a microbial species-wise manner. The above analysis for the  
229 top-20 most abundant species detected in the strand-based mapping of reads is depicted in Figure 2.  
230 After measuring the proportion of mismatches and indels (opened gaps in queries and targets under  
231 alignment scoring configuration - see methods), we observed that forward reads produced  
232 alignments on 16S rRNA gene sequences with a homogeneous distribution of indels across the  
233 species (observation extended to less abundant species), and that variation in mismatch rates were  
234 peculiarly more pronounced in species such as *Oscillibacter valericigenes*, *Phascolarctobacterium*  
235 *faecium*, and *Roseburia hominis*, thus suggesting a probable detection of strain-associated genetic  
236 variation for the microbial communities evaluated. Similar patterns were observed for the appraisal  
237 of the alignments produced from reverse reads indicating there were no drastic changes in the  
238 quality of alignments originated by both subsets of reads. The absence of several and notable shifts

239 in the distribution of mismatches in reverse reads was expected since the reference database used  
240 for such mapping is thought to contain already the potential genetic variation uncovered from the  
241 previous forward reads binning (Figure 2).

242 After merging forward and reverse reads to obtain final *rrn* assemblies, we retrieved a total of 229  
243 *rrn* sequences that were subject of cross-identification to evaluate the taxonomy annotation using  
244 different methods and databases used by dozens of taxonomy classifiers as reference. We found  
245 limitations to do so given the scarce taxonomic information of this multi-locus region despite the  
246 fact that it contains the classical marker for species bacterial identification, the 16S rRNA gene.  
247 When we explored the SILVA "ssu" and "lsu" databases (for analysis of 16S and 23S rRNA genes,  
248 respectively) through the SINA aligner, we obtained classifications towards genus level given this is  
249 the deeper taxonomy level predominantly found in this database. Accordingly, we retrieved a genus  
250 match for 155 (68%) *rrn* sequences using the 16S marker and 133 (58%) genus matches using the  
251 23S marker. Most of the remaining assemblies were correctly identified at family and order levels.  
252 Similar performances were observed when using the 16S taxonomic classification of the RDP and  
253 Greengenes databases. Additionally, we submitted the set of 229 *rrn* sequences to the Blast server  
254 at NCBI (<https://blast.ncbi.nlm.nih.gov/Blast.cgi>) to be compared to the non-redundant nucleotide  
255 collection and the reference 16S database. Top hits from the non-redundant nucleotide database  
256 (based on the TS score - see methods) indicated that only 124 *rrn* sequences (54%) produced  
257 alignments covering  $\geq 95\%$  of the query length. The global assessment of *rrn* sequences against this  
258 database also produced hits predominantly annotated as "uncultured bacteria" (54%). Among the  
259 subset of alignments covering  $\geq 95\%$  of query length, we observed that those supporting the species  
260 match had an averaged sequence identity of  $98.61 \pm 1.69$  (mean  $\pm$  sd), whereas those supporting  
261 genus and "uncultured bacteria" matches had an averaged sequence identity of  $94.69 \pm 3.43$  and  
262  $95.46 \pm 3.67$ , respectively. Similar distributions were observed for alignments covering less than  
263 95% of query sequences, where predominantly the 23S region was preferentially explored

264 (alignment length ~2,630 nt on average). Examples of full *rrn* sequences retrieving matched  
265 annotations and including those with lower, mid, and higher coverage are disclosed in [Figure S2](#).

266 In summary, we obtained the best results when comparing the *rrn* sequences against the reference  
267 16S NCBI database (release May 2019). This enable us to identify correctly 183 of the sequences  
268 (80%) at the species level and 23 (10%) at genus level. The remained 23 *rrn* sequences (10%)  
269 matched with species belonging to different genus, but in all cases were related to species of the  
270 Enterobacteriaceae family (e.g. *Shigella*, *Escherichia*, *Citrobacter*, *Salmonella*) difficult to  
271 distinguish by inspecting only the 16S rRNA gene sequence [18]. The global assessment of our  
272 assembled set of *rrn* sequences against the 16S NCBI database is shown in [Figure 3A](#), where five  
273 levels of information are compiled including sequence identity, alignment length, coverage,  
274 coverage ratio (forward vs reverse reads employed in assembly), and level of match. We observed  
275 species matches even when coverage was very low (e.g. assemblies based on ten reads), and species  
276 matching with modest sequence identity (~89%), possibly indicating accumulation of high genetic  
277 variability at the strain level for certain species. The comparison of indels and mismatch proportions  
278 retrieved from alignments supporting best hits against NCBI databases, the 16S and non-redundant  
279 nucleotide collection (this last discriminating 23S alignments from those of whole *rrn*), showed an  
280 expected progressive increase in either mismatch and indels proportions from queries identified at  
281 the species, genus, and other taxonomy levels (unclassified bacteria included) ([Figure 3B](#)).  
282 However, this was only observed for 16S and 23S alignments separately since for those covering  
283 the entire *rrn* the highest mismatch and indels rates were detected for identifications at genus level  
284 ([Figure 3B](#)).

### 285 *FMT associated microbiota shifts*

286 All forward and reverse reads were mapped to assess shifts in diversity and taxonomic features. Of  
287 all reads, only 43% supported alignments with the top quality (identity and length), and used in  
288 downstream analyses. After the taxonomy assignment, we found not drastic changes in any of the

289 alpha diversity descriptors analysed. Notwithstanding, we found that the FMT increased the  
290 richness (Chao's index) of the microbiota in six out of the ten recipients (Figure S3), who showed a  
291 gain-of 31 species on average. In the remaining four recipients there was a reduction of richness  
292 resulting in an averaged loss of 16 species as a result of the FMT. The beta diversity evaluation,  
293 based on the Bray-Curtis dissimilarity index, indicated minor shifts in the microbial structure of  
294 recipients as a consequence of the FMT (PERMANOVA = 1.02,  $p = 0.403$ ). Nevertheless, the gut  
295 microbiota composition of the recipients was strongly influenced, from larger to a lesser extent, by  
296 the sequencing run (PERMANOVA = 3.69,  $p = 0.001$ ), the sex (PERMANOVA = 1.70,  $p = 0.032$ ),  
297 and the donor (PERMANOVA = 1.69,  $p = 0.004$ ). The result of this multivariate analysis is shown  
298 in Figure 4A. Globally, we observed that POST-FMT samples tended to map closer to those from  
299 donors. To further assess this hypothesis, we compared the distances (Bray-Curtis metrics) between  
300 the respective donors and the PRE-FMT microbiota, and the donors and the POST-FMT  
301 microbiota. As a result, we noted that donors' microbiota and PRE-FMT pairs were more dissimilar  
302 when compared to POST-FMT pairs, as indicated by the decreased Bray-Curtis distance. ( $p =$   
303 0.075) (Figure 4B).

304 Additionally, we performed a LMM analysis disclosing similar results than beta diversity  
305 evaluation. We found that sequencing batch, sex, and donors were the main covariates influencing  
306 the microbiota data. Furthermore, we found that age and baseline BMI also explain, to some extent,  
307 the gut microbiota variation between the subjects involved in this study. After including the  
308 variables mentioned above as random effects in the model, a list of microbial species altered as a  
309 consequence of the FMT was retrieved (Table 1). Seventeen different microbial species were found  
310 to be differentially abundant when comparing paired samples obtained before and after FMT, and  
311 only three of them seemed to decline because of the transplantation, e.g. *Bifidobacterium*  
312 *adolescentis*. Moreover, a kind of species replacement effect between *Ruminococcus bicirculans*  
313 and *Ruminococcus callidus* was observed. According to abundance and the occurrence pattern, *R.*

314 *callidus* seemed to occupy the niche of *R. bicirculans*. On the other hand, we detected several  
315 potential bacterial consortia consisting of closely related species, such as those included in the  
316 *Parabacteroides*, *Butyricimonas*, and *Sutterella* genera which all tended to raise as a consequence  
317 of the FMT (Table 1).

### 318 *Gut microbial species transferred and engrafted*

319 In order to assess species engraftment, we next deeply analysed the donor and recipient microbiota  
320 pairs at species and strain level. For that purpose, we selected *Parabacteroides merdae*, a  
321 predominant species in the samples assessed and showing a remarkable change as a result of the  
322 FMT (Figure 5A), and *Faecalibacterium prausnitzii*, a highly abundant species in the samples  
323 analysed as well, for which an evident transference between donor-recipient pairs was not observed  
324 (Figure 5B), to detect single nucleotide variation (SNV) associated with strains. After massive  
325 analysis of the total dataset, we found three potential informative SNV sites in the *P. merdae* *rrn*,  
326 whereas six were found in the *F. prausnitzii* counterpart (Figure 5C-D). When we studied the  
327 nucleotide frequencies of these particular SNVs across samples, a clear transference pattern of *P.*  
328 *merdae* genotype from donors-to-recipients was detected as indicated by the decreased genetic  
329 distance (Bray-Curtis) between POST-FMT and donor samples when compared to that of POST-  
330 FMT and PRE-FMT pairs (Figure 5E). By contrast, the genetic distances retrieved after comparison  
331 of *F. prausnitzii* genotypes between POST-FMT or PRE-FMT samples and their donors did not  
332 indicate transference of strains belonging to this species from donors to recipients (Figure 5F).  
333 Direct Sanger sequencing of *P. merdae* SNV-743, SNV-1975, and SNV-3016 in two recipients and  
334 their common donor, supported the accuracy of our long-read based assessment of FMT (Figure  
335 5G). Globally, we observed the presence of a mix of strains in some of the samples analysed, given  
336 the basecalling profile visualised in the electropherograms (e.g. SNV-743 of Donor1 and 06-Pre  
337 samples). This pattern of strain co-existence was more evident in POST-FMT samples of both  
338 recipients analysed (see SNV-743 and SNV-1975 in Figure 5G). The predominant haplotype

339 observed in the Donor1 (A743-C1975-G3016) was transferred to the two recipients explored, and  
340 became dominant after the FMT. Similar patterns of transference were observed in other donor-  
341 recipient pairs. Globally, our results demonstrated that the increased abundance of *P. merdae* in  
342 POST-FMT samples was a direct consequence of donor's strain transmission. This is likely the case  
343 for other bacterial species increased as a result of the FMT.

#### 344 *Correlation between clinical variables and the species abundance after FMT*

345 Among multiple clinical variables evaluated in this cohort of subjects, FMT induced remarkable  
346 changes in markers of glucose metabolism and blood pressure of the recipients (Table 2). Fasting  
347 insulin ( $p = 0.030$ ), fasting glucose ( $p = 0.074$ ), and consequently, the HOMA-IR ( $p = 0.005$ ) were  
348 improved in recipients after the FMT. In line with these findings, there was a decrease in the  
349 glycosylated haemoglobin concentration after the FMT as well ( $p = 0.060$ ). On the other hand, the  
350 systolic and diastolic blood pressures were also lower as a consequence of the donor FMT treatment  
351 and reduced by 10% ( $p = 0.028$ ) and 19% ( $p = 0.0008$ ), respectively (Table 2). The concentration of  
352 faecal SCFAs such as faecal butyrate ( $p = 0.018$ ) and acetate ( $p = 0.033$ ), were decreased after the  
353 FMT but not that of propionate ( $p = 0.280$ ). Regarding markers of lipid metabolism, the HDL  
354 cholesterol levels in plasma were reduced ( $p = 0.032$ ). By computing Kendall's  $\tau$  (tau) parameter,  
355 we established associations between these clinical variables and the abundance of microbial species  
356 altered as a consequence of the FMT. Species such as *R. bicirculans*, which were reduced after  
357 FMT, correlated positively with the reduction of Hba1c, HOMA-IR, and plasma insulin ( $\tau = 0.56$ ,  
358 0.49, 0.39 and FDR = 0.017, 0.028, 0.081, respectively), whereas blood pressure parameters  
359 correlated negatively with abundance of *B. coccoides* ( $\tau = -0.55$ , -0.43 and FDR = 0.009, 0.049,  
360 respectively for Diastolic and Systolic blood pressure), and to a lesser extent with *P. merdae*  
361 abundance ( $\tau = -0.42$ , FDR = 0.091 for Diastolic blood pressure). The above correlations were not  
362 detected for other closely related species (e.g. *Ruminococcus albus*, *Ruminococcus gnavus*, *Blautia*



363 *luti*, *Blautia wexlerae*, *Parabacteroides johnsonii*, *Parabacteroides distasonis*, or *Parabacteroides*  
364 *goldsteinii*).

## 365 **Discussion**

366 The emergence of single-molecule and synthesis-free based sequencing methods and its portable  
367 devices has democratised the genomics, making itself a disruptive technology with application  
368 across multiple life-science and clinical disciplines. In general, the central claim of the third-  
369 generation sequencing platforms, despite their higher error-rates, is the ability to produce very long  
370 DNA reads with a handy application to resolve eukaryote genomes and their repetitive structures  
371 [19-24]. This strength has also been advantageous to better assess the composition of complex  
372 microbial communities, making it possible to expand the genetic information classically used in  
373 microbiota surveys and retrieving reliable taxonomy identifications at the species-level [1, 25].

374 Here we explored the *rrn* of the human gut microbiota through the nanopore sequencing and *de*  
375 *novo* assembly of this multi-locus hypervariable region to gain insights into these genetic markers  
376 and their potential use to deeply characterize complex communities at species and strain level.  
377 Through the pipeline for the *rrn* assembly, we realised that the indels rate during the strand-wise  
378 alignments was always higher than mismatches, likely an effect of the alignment parameters (see  
379 methods). Notwithstanding, close inspections of the alignments suggest that such indels are  
380 produced in homopolymeric regions (containing single or di-nucleotide repeats), a common failure  
381 during basecalling of nanopore data [21, 26]. On the other hand, the final assemblies were  
382 recovered with less than 1% indels proportions when compared to database references, thus  
383 indicating they were drastically attenuated when compared to the strand-wise evaluation, and  
384 suggesting that assemblies have largely been improved to correct typical errors of nanopore data,  
385 and likely retaining the nucleotide changes (mismatches) linked to species/strains genetic  
386 variability.

387 In our study, identifications of assembled *rrn* were based mostly on sequence identities higher than  
388 99%, achieving a similar accuracy as in previous studies based on *de novo* genome assembly [20,  
389 22]. Furthermore, we have been able to detect the variability at strain level because the *rrn*  
390 sequences retrieved allowed the correct identification of bacterial species showing 89% and 91%  
391 sequence identity, against references, when using the 16S rRNA gene and the entire *rrn* region as  
392 query, respectively. Nevertheless, the possibility that some of the species identified could be novel  
393 ones cannot be disregarded despite the vast amount of genetic and taxonomy information of  
394 microbes inhabiting the gut environment compiled during last years [27-29]. Interestingly, we have  
395 also obtained correct species identification through *rrn* sequencing supported by very low coverage  
396 assemblies, at least ten reads. Since the R7.3 was initially released, the constantly improved  
397 chemistry on nanopore devices enables better assemblies with lower coverages [21, 30]. Therefore,  
398 the improved chemistry releases (e.g. R10 and later) are also expected to influence the quality of  
399 assemblies and to increase drastically the sensitivity of this approach to detect and measure reliably  
400 and rapidly the presence of more microbial species/strains in the gut microbiota.

401 We provided *de novo* reliable assemblies for more than two-hundred *rrn* regions of human gut  
402 microbes. The taxonomic identification of such assemblies indicated that the best results were those  
403 obtained with the 16S rRNA NCBI database (different releases used during assembly and  
404 annotation) probably because this is the most studied and used marker for bacteria taxonomy.  
405 Furthermore, the high amount of high sequence identity matches (>95%) retrieved with  
406 "unculturable bacteria" when *rrn* assemblies were compared against the NCBI non-redundant  
407 nucleotide collection, highlights the high level of uncertainty of taxonomic assignments done based  
408 on metagenome assembled genomes (MAGs) released so far in major public repositories. The  
409 assembled *rrn* regions could represent the basis for taxonomy identification of these unclassified  
410 entries given the distribution of mismatches was close to that observed for positively identified *rrn*  
411 assemblies. Additionally, future *rrn* comparative assessments on large collection of MAGs [27]

412 could help to solve taxonomy issues on gene catalogues of the human microbiome. The annotation  
413 of the final *rrn* assemblies obtained against different databases and algorithms indicated that we  
414 were able to reconstruct a large proportion of *rrn* regions from approximately 40 new microbial  
415 species, and more than 150 new strains absent in the first database release [6].

416 By using approximately a dataset consisting of 400K nanopore reads derived from 24 samples, the  
417 updated *rrn* database, and controlling the covariates influencing the microbiota, we proved the  
418 validity of the methodology to assess changes in the human gut microbiota at species and strain  
419 level as a consequence of a FMT intervention. This long amplicon-based approach, enable us to  
420 detect the increase of several species from the *Parabacteroides*, *Butyricimonas*, *Ruminococcus*, and  
421 *Sutterella* species as a result of FMT. Additionally to age, sex, sequencing run, and baseline BMI,  
422 we found that the donor is a critical covariate of the impact of the FMT in the recipient microbiota  
423 when using a unique donor for multiple recipients. These results are partly in agreement with those  
424 previously published using short-reads from V4 hypervariable regions of the 16S rRNA bacterial  
425 gene [11], however, our results outperform the taxonomy resolution reached previously, thus  
426 providing a more accurate gut microbiota survey. Interestingly, a recent FMT study to treat  
427 ulcerative colitis (UC) where the microbiota was analysed sequencing short-reads also showed  
428 increases of *Sutterella* species as a consequence of the intervention [31]. Similarly, the abundance  
429 of *Butyricimonas* species was increased as a consequence of an FMT intervention to eradicate  
430 antibiotic-resistant bacteria [32]. These findings suggest that some species could be often shifted as  
431 a result of the FMT in humans, regardless the condition of the recipient.

432 Nonetheless, the presumable transference of species between donor and recipients and their  
433 engraftment could not be confirmed based on the short-read amplicon technology due to the lack of  
434 sufficient resolution. Also the potential replacement between closely related species in the recipient  
435 could be overseen in conventional microbiota surveys based on short-reads. To shed light on the  
436 ability of the *rrn* sequencing approach to assess SNVs likely associated with the strain diversity, we

437 selected *P. merdae*, a species that exhibited a remarkable increase in the recipients' gut after FMT,  
438 and *F. prausnitzii*, which seemed to be not affected by the FMT intervention. The combined  
439 information of three different informative SNVs from the *P. merdae rrm* demonstrated that the  
440 increase of this species in recipients after FMT was more than likely because of the strain  
441 transference from donors.

442 The taxonomic resolution achieved with our sequencing approach also would help to support more  
443 firmly a causal relationship between the changes in the gut microbiota and the improvements in the  
444 recipients' metabolic markers and blood pressure since robust evidence of the transference of  
445 bacterial strains from the donor to the recipient that correlated to the improved clinical variables  
446 could be provided. Notwithstanding, the direct implication of particular species such as *B.*  
447 *coccoides* and *P. merdae* and their strains in the improvement of cardio-metabolic health markers  
448 would need to be further explored in future (single strain) intervention studies. The performance of  
449 nanopore-generated data for identification of single-nucleotide polymorphisms (SNP) on eukaryote  
450 and prokaryote organisms has been previously reported [33, 34]. Altogether, those results suggest  
451 that despite the error-prone nature of these data, well-processed nanopore reads have enough quality  
452 to estimate SNVs, additionally to its recognised utility for chromosome assemblies.

453 The capacity of the methodology described in here to unveil SNVs will be pivotal in the near future  
454 to establish reliable genotype-to-phenotype associations between human diseases and microbiome  
455 at the strain-level. Additionally to its cost-effectivity, the data derived from our method could be  
456 analysed in a reference-based (read mapping against the *rrm* database) or reference-independent  
457 manner (read assembly into discrete similarity clusters), making this approach versatile either for  
458 strain surveillance and discovery. All in all, the features mentioned above should be central to  
459 define subtle genetic variation in the human microbiome and profiling such variants as harmful or  
460 beneficial for human health, what is part of an envisioned field of research in the frame of the  
461 epidemiology of microbial communities and the human microbiome [35].

## 462 **Conclusions**

463 The updated version of the *rrn* database will be useful to do reliable microbial surveys at the species  
464 level and, potentially, to infer strain variations taking into account the most abundant members of  
465 the human intestinal microbiota. This long-read approach allows the detection of species- and  
466 strain-level changes in the microbiota at lower cost compared to the expensive shotgun-DNA-  
467 sequencing-based metagenomics approach that up to date is the only one with the ability to provide  
468 such level of information. Thus, the affordability of this methodology will help to improve  
469 microbiota surveys aiming to discriminate the human gut microbial species associated with health  
470 and disease. This methodology has been proven to perform well for the identification of species and  
471 strains transferred and engrafted in the gut microbiota of the new recipients receiving FMT, as a  
472 proof of concept. Considering our promising results, future studies should be conducted to expand  
473 the knowledge of *rrn* diversity across this and other environments, using improved releases of the  
474 nanopore chemistry, and to provide more robust tools for microbiome research progressing towards  
475 their standardization.

## 476 **List of abbreviations**

477 BMI, body mass index; FDR, false discovery rate; FMT, faecal microbiota transplantation; LMM,  
478 linear mixed model; NCBI, national center for biotechnology information; MAG, metagenome  
479 assembled genome; PCoA, principal coordinate analysis; PCR, polymerase chain reaction; RDP,  
480 ribosomal database project; *rrn*, bacterial ribosome RNA operon (16S-ITS-23S); SNP, single  
481 nucleotide polymorphism, SNV, single nucleotide variation; UC, ulcerative colitis.

## 482 **Declarations**

### 483 *Ethics approval and consent to participate*

484 The study was prospectively registered at the Dutch Trial registry  
485 (<https://www.trialregister.nl/trial/4488>), conducted according to the guidelines laid down in the  
486 Declaration of Helsinki and the ethical standards of the responsible local committee on human  
487 experimentation of the Amsterdam UMC (location AMC) [11]. Registered on August 1<sup>st</sup>, 2014.  
488 First participant was enrolled on September 1<sup>st</sup>, 2014.

### 489 *Availability of data and material*

490 The albacore-based called *fast5* files obtained from respective runs are publicly available in the  
491 European Nucleotide Archive upon accession number <PRJEB33947>. The updated *rrn* database  
492 (*rrn\_DBv2*) is publicly accessible at the GitHub repository [https://github.com/alfbenpa/rrn\\_DBv2](https://github.com/alfbenpa/rrn_DBv2).

### 493 *Competing interests*

494 The authors have no conflict of interest to declare.

### 495 *Funding*

496 This study was supported by the EU Project MyNewGut (No. 613979) from the European  
497 Commission 7th Framework Programme and the grant AGL2017-88801-P from Ministry of  
498 Science, Innovation and Universities (MICIU; Spain) that funded the extension of the contract of  
499 ABP. The Miguel Servet CP19/00132 grant from the Spanish Institute of Health Carlos III (ISCIII)  
500 to ABP is fully acknowledged.

### 501 *Authors' contributions*

502 ABP conceived and designed the study. ABP performed sequencing experimental research and data  
503 analysis, AVH and MN performed clinical research. ABP and YS directed the study. ABP and YS  
504 wrote the manuscript. All authors reviewed and approved the final version of the manuscript.

505

## 506 References

- 507 1. Benitez-Paez A, Portune KJ, Sanz Y: **Species-level resolution of 16S rRNA gene amplicons**  
508 **sequenced through the MinION portable nanopore sequencer.** *Gigascience* 2016, **5**:4.
- 509 2. Cusco A, Catozzi C, Vines J, Sanchez A, Francino O: **Microbiota profiling with long amplicons**  
510 **using Nanopore sequencing: full-length 16S rRNA gene and whole rrr operon.** *F1000Res* 2018,  
511 **7**:1755.
- 512 3. Sakai J, Tarumoto N, Kodana M, Ashikawa S, Imai K, Kawamura T, Ikebuchi K, Murakami T,  
513 Mitsutake K, Maeda T, Maesaki S: **An identification protocol for ESBL-producing Gram-**  
514 **negative bacteria bloodstream infections using a MinION nanopore sequencer.** *J Med Microbiol*  
515 2019, **68**:1219-1226.
- 516 4. Shin H, Lee E, Shin J, Ko SR, Oh HS, Ahn CY, Oh HM, Cho BK, Cho S: **Elucidation of the**  
517 **bacterial communities associated with the harmful microalgae *Alexandrium tamarense* and**  
518 ***Cochlodinium polykrikoides* using nanopore sequencing.** *Sci Rep* 2018, **8**:5323.
- 519 5. Shin J, Lee S, Go MJ, Lee SY, Kim SC, Lee CH, Cho BK: **Analysis of the mouse gut microbiome**  
520 **using full-length 16S rRNA amplicon sequencing.** *Sci Rep* 2016, **6**:29681.
- 521 6. Benitez-Paez A, Sanz Y: **Multi-locus and long amplicon sequencing approach to study microbial**  
522 **diversity at species level using the MinION portable nanopore sequencer.** *Gigascience* 2017,  
523 **6**:1-12.
- 524 7. Kerkhof LJ, Dillon KP, Haggblom MM, McGuinness LR: **Profiling bacterial communities by**  
525 **MinION sequencing of ribosomal operons.** *Microbiome* 2017, **5**:116.
- 526 8. Peker N, Garcia-Croes S, Dijkhuizen B, Wiersma HH, van Zanten E, Wisselink G, Friedrich AW,  
527 Kooistra-Smid M, Sinha B, Rossen JWA, Couto N: **A Comparison of Three Different**  
528 **Bioinformatics Analyses of the 16S-23S rRNA Encoding Region for Bacterial Identification.**  
529 *Front Microbiol* 2019, **10**:620.
- 530 9. Brewer TE, Albertsen M, Edwards A, Kirkegaard RH, Rocha EPC: **Unlinked rRNA genes are**  
531 **widespread among Bacteria and Archaea.** *bioRxiv* 2019:705046.
- 532 10. Krehenwinkel H, Pomerantz A, Henderson JB, Kennedy SR, Lim JY, Swamy V, Shoobridge JD,  
533 Graham N, Patel NH, Gillespie RG, Prost S: **Nanopore sequencing of long ribosomal DNA**  
534 **amplicons enables portable and simple biodiversity assessments with high phylogenetic**  
535 **resolution across broad taxonomic scale.** *Gigascience* 2019, **8**.
- 536 11. Hartstra AV, Schüppel V, Imangaliyev S, Schrantee A, Prodan A, Collard D, Levin E, Dallinga-Thie  
537 G, Ackermans MT, Winkelmeijer M, et al: **Infusion of donor feces affects the gut-brain axis in**  
538 **humans with metabolic syndrome.** *Mol Metab* 2020:in press.
- 539 12. Kielbasa SM, Wan R, Sato K, Horton P, Frith MC: **Adaptive seeds tame genomic sequence**  
540 **comparison.** *Genome Res* 2011, **21**:487-493.
- 541 13. Katoh K, Standley DM: **MAFFT multiple sequence alignment software version 7: improvements**  
542 **in performance and usability.** *Mol Biol Evol* 2013, **30**:772-780.
- 543 14. Eddy SR: **Accelerated Profile HMM Searches.** *PLoS Comput Biol* 2011, **7**:e1002195.

- 544 15. Quast C, Pruesse E, Yilmaz P, Gerken J, Schweer T, Yarza P, Peplies J, Glockner FO: **The SILVA**  
545 **ribosomal RNA gene database project: improved data processing and web-based tools.** *Nucleic*  
546 *Acids Res* 2013, **41**:D590-596.
- 547 16. Pruesse E, Peplies J, Glockner FO: **SINA: accurate high-throughput multiple sequence**  
548 **alignment of ribosomal RNA genes.** *Bioinformatics* 2012, **28**:1823-1829.
- 549 17. Caporaso JG, Kuczynski J, Stombaugh J, Bittinger K, Bushman FD, Costello EK, Fierer N, Pena  
550 AG, Goodrich JK, Gordon JI, et al: **QIIME allows analysis of high-throughput community**  
551 **sequencing data.** *Nat Methods* 2010, **7**:335-336.
- 552 18. Naum M, Brown EW, Mason-Gamer RJ: **Is 16S rDNA a reliable phylogenetic marker to**  
553 **characterize relationships below the family level in the enterobacteriaceae?** *J Mol Evol* 2008,  
554 **66**:630-642.
- 555 19. Belser C, Istace B, Denis E, Dubarry M, Baurens FC, Falentin C, Genete M, Berrabah W, Chevre  
556 AM, Delourme R, et al: **Chromosome-scale assemblies of plant genomes using nanopore long**  
557 **reads and optical maps.** *Nat Plants* 2018, **4**:879-887.
- 558 20. Deschamps S, Zhang Y, Llaca V, Ye L, Sanyal A, King M, May G, Lin H: **A chromosome-scale**  
559 **assembly of the sorghum genome using nanopore sequencing and optical mapping.** *Nat*  
560 *Commun* 2018, **9**:4844.
- 561 21. Jain M, Koren S, Miga KH, Quick J, Rand AC, Sasani TA, Tyson JR, Beggs AD, Dilthey AT,  
562 Fiddes IT, et al: **Nanopore sequencing and assembly of a human genome with ultra-long reads.**  
563 *Nat Biotechnol* 2018, **36**:338-345.
- 564 22. Tyson JR, O'Neil NJ, Jain M, Olsen HE, Hieter P, Snutch TP: **MinION-based long-read**  
565 **sequencing and assembly extends the Caenorhabditis elegans reference genome.** *Genome Res*  
566 2018, **28**:266-274.
- 567 23. Li Q, Li H, Huang W, Xu Y, Zhou Q, Wang S, Ruan J, Huang S, Zhang Z: **A chromosome-scale**  
568 **genome assembly of cucumber (Cucumis sativus L.).** *Gigascience* 2019, **8**.
- 569 24. Masonbrink R, Maier TR, Muppirala U, Seetharam AS, Lord E, Juvale PS, Schmutz J, Johnson NT,  
570 Korkin D, Mitchum MG, et al: **The genome of the soybean cyst nematode (Heterodera glycines)**  
571 **reveals complex patterns of duplications involved in the evolution of parasitism genes.** *BMC*  
572 *Genomics* 2019, **20**:119.
- 573 25. Schloss PD, Jenior ML, Koumpouras CC, Westcott SL, Highlander SK: **Sequencing 16S rRNA**  
574 **gene fragments using the PacBio SMRT DNA sequencing system.** *PeerJ* 2016, **4**:e1869.
- 575 26. Zascavage RR, Thorson K, Planz JV: **Nanopore sequencing: An enrichment-free alternative to**  
576 **mitochondrial DNA sequencing.** *Electrophoresis* 2019, **40**:272-280.
- 577 27. Almeida A, Nayfach S, Boland M, Strozzi F, Beracochea M, Shi ZJ, Pollard KS, Sakharova E, Parks  
578 DH, Hugenholz P, et al: **A unified catalog of 204,938 reference genomes from the human gut**  
579 **microbiome.** *Nat Biotechnol* 2020.
- 580 28. Li J, Jia H, Cai X, Zhong H, Feng Q, Sunagawa S, Arumugam M, Kultima JR, Prifti E, Nielsen T, et  
581 al: **An integrated catalog of reference genes in the human gut microbiome.** *Nat Biotechnol* 2014,  
582 **32**:834-841.
- 583 29. Pasolli E, Asnicar F, Manara S, Zolfo M, Karcher N, Armanini F, Beghini F, Manghi P, Tett A,  
584 Ghensi P, et al: **Extensive Unexplored Human Microbiome Diversity Revealed by Over 150,000**



- 585           **Genomes from Metagenomes Spanning Age, Geography, and Lifestyle.** *Cell* 2019, **176**:649-662  
586           e620.
- 587    30.       Solares EA, Chakraborty M, Miller DE, Kalsow S, Hall K, Perera AG, Emerson JJ, Hawley RS:  
588           **Rapid Low-Cost Assembly of the *Drosophila melanogaster* Reference Genome Using Low-**  
589           **Coverage, Long-Read Sequencing.** *G3 (Bethesda)* 2018, **8**:3143-3154.
- 590    31.       Paramsothy S, Nielsen S, Kamm MA, Deshpande NP, Faith JJ, Clemente JC, Paramsothy R, Walsh  
591           AJ, van den Bogaerde J, Samuel D, et al: **Specific Bacteria and Metabolites Associated With**  
592           **Response to Fecal Microbiota Transplantation in Patients With Ulcerative Colitis.**  
593           *Gastroenterology* 2019, **156**:1440-1454 e1442.
- 594    32.       Bilinski J, Grzesiowski P, Sorensen N, Madry K, Muszynski J, Robak K, Wroblewska M,  
595           Dzieciatkowski T, Dulny G, Dwilewicz-Trojaczek J, et al: **Fecal Microbiota Transplantation in**  
596           **Patients With Blood Disorders Inhibits Gut Colonization With Antibiotic-Resistant Bacteria:**  
597           **Results of a Prospective, Single-Center Study.** *Clin Infect Dis* 2017, **65**:364-370.
- 598    33.       Bainomugisa A, Duarte T, Lavu E, Pandey S, Coulter C, Marais BJ, Coin LM: **A complete high-**  
599           **quality MinION nanopore assembly of an extensively drug-resistant *Mycobacterium***  
600           **tuberculosis Beijing lineage strain identifies novel variation in repetitive PE/PPE gene regions.**  
601           *Microb Genom* 2018, **4**.
- 602    34.       Malmberg MM, Spangenberg GC, Daetwyler HD, Cogan NOI: **Assessment of low-coverage**  
603           **nanopore long read sequencing for SNP genotyping in doubled haploid canola (*Brassica napus***  
604           **L.).** *Sci Rep* 2019, **9**:8688.
- 605    35.       Yan Y, Nguyen LH, Franzosa EA, Huttenhower C: **Strain-level epidemiology of microbial**  
606           **communities and the human microbiome.** *Genome Med* 2020, **12**:71.
- 607

## 608 Tables

609 Table 1. Changes in abundance and prevalence of gut microbial species after FMT.

| Genus                   | Species                                           | Abundance<br>PRE-FMT<br>(N = 10) <sup>1</sup> | Abundance<br>POST-FMT<br>(N = 10) <sup>1</sup> | Prevalence<br>PRE-FMT<br>(N = 10) | Prevalence<br>POST-FMT<br>(N = 10) | p-value |
|-------------------------|---------------------------------------------------|-----------------------------------------------|------------------------------------------------|-----------------------------------|------------------------------------|---------|
| <i>Parabacteroides</i>  | <i>P. merdae</i>                                  | 3.44 ± 0.61                                   | 4.36 ± 0.26                                    | 100%                              | 100%                               | 0.002   |
|                         | <i>P. johnsonii</i>                               | 1.46 ± 1.58                                   | 2.97 ± 0.48                                    | 50%                               | 100%                               | 0.005   |
|                         | <i>P. goldsteinii</i>                             | 1.60 ± 1.75                                   | 2.65 ± 1.08                                    | 50%                               | 90%                                | 0.032   |
| <i>Butyricimonas</i>    | <i>B. paravirosa</i>                              | 1.18 ± 1.27                                   | 2.44 ± 0.89                                    | 50%                               | 90%                                | 0.031   |
|                         | <i>B. virosa</i>                                  | 2.44 ± 1.39                                   | 3.33 ± 0.50                                    | 80%                               | 100%                               | 0.033   |
| <i>Ruminococcus</i>     | <b><u><i>R. bicirculans</i></u></b> <sup>2</sup>  | <b><u>1.84 ± 1.66</u></b>                     | <b><u>0.58 ± 1.34</u></b>                      | <b><u>60%</u></b>                 | <b><u>20%</u></b>                  | 0.017   |
|                         | <i>R. callidus</i>                                | 0.41 ± 0.86                                   | 1.64 ± 1.51                                    | 20%                               | 60%                                | 0.010   |
| <i>Sutterella</i>       | <i>S. massiliensis</i>                            | 3.05 ± 1.39                                   | 4.17 ± 0.69                                    | 90%                               | 100%                               | 0.021   |
|                         | <i>S. wadsworthensis</i>                          | 2.27 ± 1.73                                   | 3.44 ± 0.86                                    | 70%                               | 100%                               | 0.019   |
| <i>Bacteroides</i>      | <i>B. finegoldii</i>                              | 0.83 ± 1.35                                   | 2.17 ± 1.23                                    | 30%                               | 80%                                | 0.046   |
| <i>Bifidobacterium</i>  | <b><u><i>B. adolescentis</i></u></b> <sup>2</sup> | <b><u>2.32 ± 1.60</u></b>                     | <b><u>1.95 ± 1.40</u></b>                      | <b><u>70%</u></b>                 | <b><u>70%</u></b>                  | 0.024   |
| <i>Blautia</i>          | <i>B. coccoides</i>                               | 1.33 ± 1.45                                   | 2.44 ± 0.89                                    | 50%                               | 90%                                | 0.034   |
| <i>Coprococcus</i>      | <i>C. eutactus</i>                                | 2.08 ± 1.58                                   | 2.85 ± 1.62                                    | 70%                               | 80%                                | 0.045   |
| <i>Desulfovibrio</i>    | <i>D. piger</i>                                   | 1.76 ± 1.95                                   | 2.90 ± 1.29                                    | 50%                               | 90%                                | 0.035   |
| <i>Paraprevotella</i>   | <i>P. clara</i>                                   | 2.06 ± 1.52                                   | 3.66 ± 0.46                                    | 70%                               | 100%                               | 0.011   |
| <i>Prevotella</i>       | <i>P. bivia</i>                                   | 0.63 ± 1.03                                   | 1.99 ± 1.44                                    | 30%                               | 70%                                | 0.038   |
| <i>Terrisporobacter</i> | <b><u><i>T. mayombi</i></u></b> <sup>2</sup>      | <b><u>1.96 ± 1.72</u></b>                     | <b><u>1.24 ± 1.36</u></b>                      | <b><u>60%</u></b>                 | <b><u>50%</u></b>                  | 0.029   |

610 1 Data expressed as the mean of the number of normalised reads in log<sub>10</sub> scale ± standard deviation  
611 (sd).

612 2 Results underlined are those of bacterial species decreasing after FMT.

613

614

615 Table 2. Clinical variables altered after the FMT.

| Clinical outcome         | PRE-FMT<br>(N = 10) <sup>1</sup> | POST-FMT<br>(N = 10) <sup>1</sup> | Statistics              |
|--------------------------|----------------------------------|-----------------------------------|-------------------------|
| Diastolic blood pressure | 87.4 ± 8.2                       | 72.0 ± 9.9                        | $v = -16.9, p < 0.001$  |
| Systolic blood pressure  | 138.6 ± 15.3                     | 124.5 ± 14.2                      | $v = -14.2, p = 0.028$  |
| Fasting glucose (mmol/L) | 5.49 ± 0.35                      | 5.31 ± 0.50                       | $v = -0.18, p = 0.074$  |
| Fasting insulin (mg/dL)  | 84.7 ± 30.9                      | 63.6 ± 21.9                       | $v = -19.0, p = 0.030$  |
| HOMA-IR                  | 2.96 ± 0.99                      | 2.16 ± 0.78                       | $v = -0.93, p = 0.005$  |
| Hba1c (mmol/L)           | 36.5 ± 4.1                       | 35.7 ± 3.6                        | $v = -0.96, p = 0.060$  |
| Plasma HDL (mmol/L)      | 1.59 ± 0.29                      | 1.40 ± 0.23                       | $v = -0.191, p = 0.032$ |
| Faecal butyrate (µmol/g) | 88.6 ± 44.2                      | 60.3 ± 40.9                       | $v = -31.6, p = 0.018$  |
| Faecal acetate (µmol/g)  | 434.0 ± 148.3                    | 308.2 ± 121.1                     | $v = -135.7, p = 0.033$ |

616 <sup>1</sup> Data expressed as the mean ± standard deviation (sd).

617  $v$  = variation between groups analysed applying a LMM (PRE-FMT group as reference), HDL =  
618 high density lipoprotein, Hba1c = glycosylated haemoglobin.

619

## 620 **Figure legends**

621 **Figure 1.** Graphical description of the study. Data acquisition and processing steps, including the  
622 sample selection, amplicon sequencing, and the general pipeline to assemble de novo *rrn* regions  
623 from human gut microbiota, are depicted.

624 **Figure 2.** Comparative analysis of the stranded-based alignment of nanopore reads to respective  
625 baits before assembly. In each case, the alignments for the top 20 most abundant species were  
626 evaluated in terms of the indels and mismatch content across the full set of reads mapped. The  
627 species occurrence of the individual forward and reverse read assessments is linked by dashed lines.  
628 These density ridgeline plots were designed with the *ggridges* R package.

629 **Figure 3.** Taxonomic identification of final *rrn* assemblies. A - Scatter plot showing information for  
630 the sequence identity supporting the identification of assembled *rrn* against the NCBI 16S database,  
631 and the coverage (number of reads) accounted for the respective assemblies. Additional levels of  
632 information are included in the plot such as taxonomy level match, bias coverage between forward  
633 and reverse reads, and alignment size (see graph symbols and their colour and size scale). B - The  
634 indel and mismatch content evaluation in the alignments resulting from cross-identification of *rrn*  
635 assemblies against the NCBI 16S database and the non-redundant nucleotide collection (GenBank).  
636 Those values were discriminated by the taxonomic level of identification according to the original  
637 species-level annotation of respective *rrns* (see the colour legend). UB, uncultured bacteria.

638 **Figure 4.** Beta diversity of the microbial communities assessed by *rrn* sequencing. A - Scatter plot  
639 compiling data from the multivariate analysis (principal coordinate analysis - PCoA) of the  
640 microbiota from recipients and donors involved in the FMT. The donor and recipient samples and  
641 the sampling time points, are defined according to the legend on top. PCo; principal coordinate (the  
642 two most informative are shown). B - A genetic distance-based approach to evaluate microbiota  
643 transference between donors and recipients pairs. The microbial community structures of PRE-FMT

644 and POST-FMT samples were compared with donors, respectively, through the calculation of the  
645 Bray-Curtis dissimilarity index and represented as boxplots. The Wilcoxon signed-rank test for  
646 paired samples was used to compare differences in genetic distances.

647 **Figure 5.** Single nucleotide variation (SNV) analysis to detect species transference and  
648 engraftment. The species *Parabacteroides merdae* and *Faecalibacterium prausnitzii* *rrns* were used  
649 to unveil SNVs within each species and their abundance as a consequence of the FMT (A and B  
650 panels, respectively). C and D - The mapping, indexing, and pileup of thousands of reads on *P.*  
651 *merdae* and *F. prausnitzii* *rrn* enable us to uncover polymorphic sites exhibiting an even frequency  
652 for at least two nucleotides. Those potential SNVs are highlighted inside open circles, and the  
653 position number in the *rrn* is also indicated. The structural arrangement of the *rrn* is drawn on the x-  
654 axis. The black lines indicate the relative frequency of the dominant allele, whereas the grey lines  
655 indicate the relative coverage per site related to the average across the *rrn*. E and F - The  
656 distribution of the Bray-Curtis dissimilarity index of the microbiota between POST-FMT and PRE-  
657 FMT samples and the corresponding donors, using the combined nucleotide frequencies of SNVs  
658 detected in *P. merdae* and *F. prausnitzii*, respectively. The Wilcoxon signed-rank test for paired  
659 samples was used to compare the genetic distances of the microbiotas. G - Electropherograms  
660 obtained from Sanger sequencing for the strains of *P. merdae* SNV-743, SNV-1975, and SNV-  
661 3016. The predominant alleles inferred for every sample (based on the Q-score of basecalling)  
662 supported the hypothesis of that the strains were transferred between donors and recipients pairs, as  
663 anticipated during the nanopore-based assessment.

664 **Figure S1.** Comparative analysis of the alignments based on forward and reverse reads. Sequence  
665 identity, mismatch and indels proportions, are represented as histograms. Sequencing runs  
666 discriminate the distributions (see colour legend). Vertical dotted lines of the sequence identity plots  
667 indicate the threshold for selection of high-quality reads for downstream analyses.

668 **Figure S2.** Blast-based results showing correct identification of assembled *rrns*. The top hits  
669 supporting the identification are shown for six different *rrns* assembled with low, mid or high  
670 coverage (number of reads).

671 **Figure S3.** Alpha diversity of the recipients' microbiota s before and after FMT. The distribution of  
672 values obtained for four alpha diversity indicators, including the Chao's index, Shannon's index,  
673 reciprocal Simpson's index, and dominance index are shown as boxplots. The results of the  
674 Wilcoxon signed-rank test applied to establish differences between the two groups of samples  
675 (POST-FMT and PRE-FMT) is also shown.

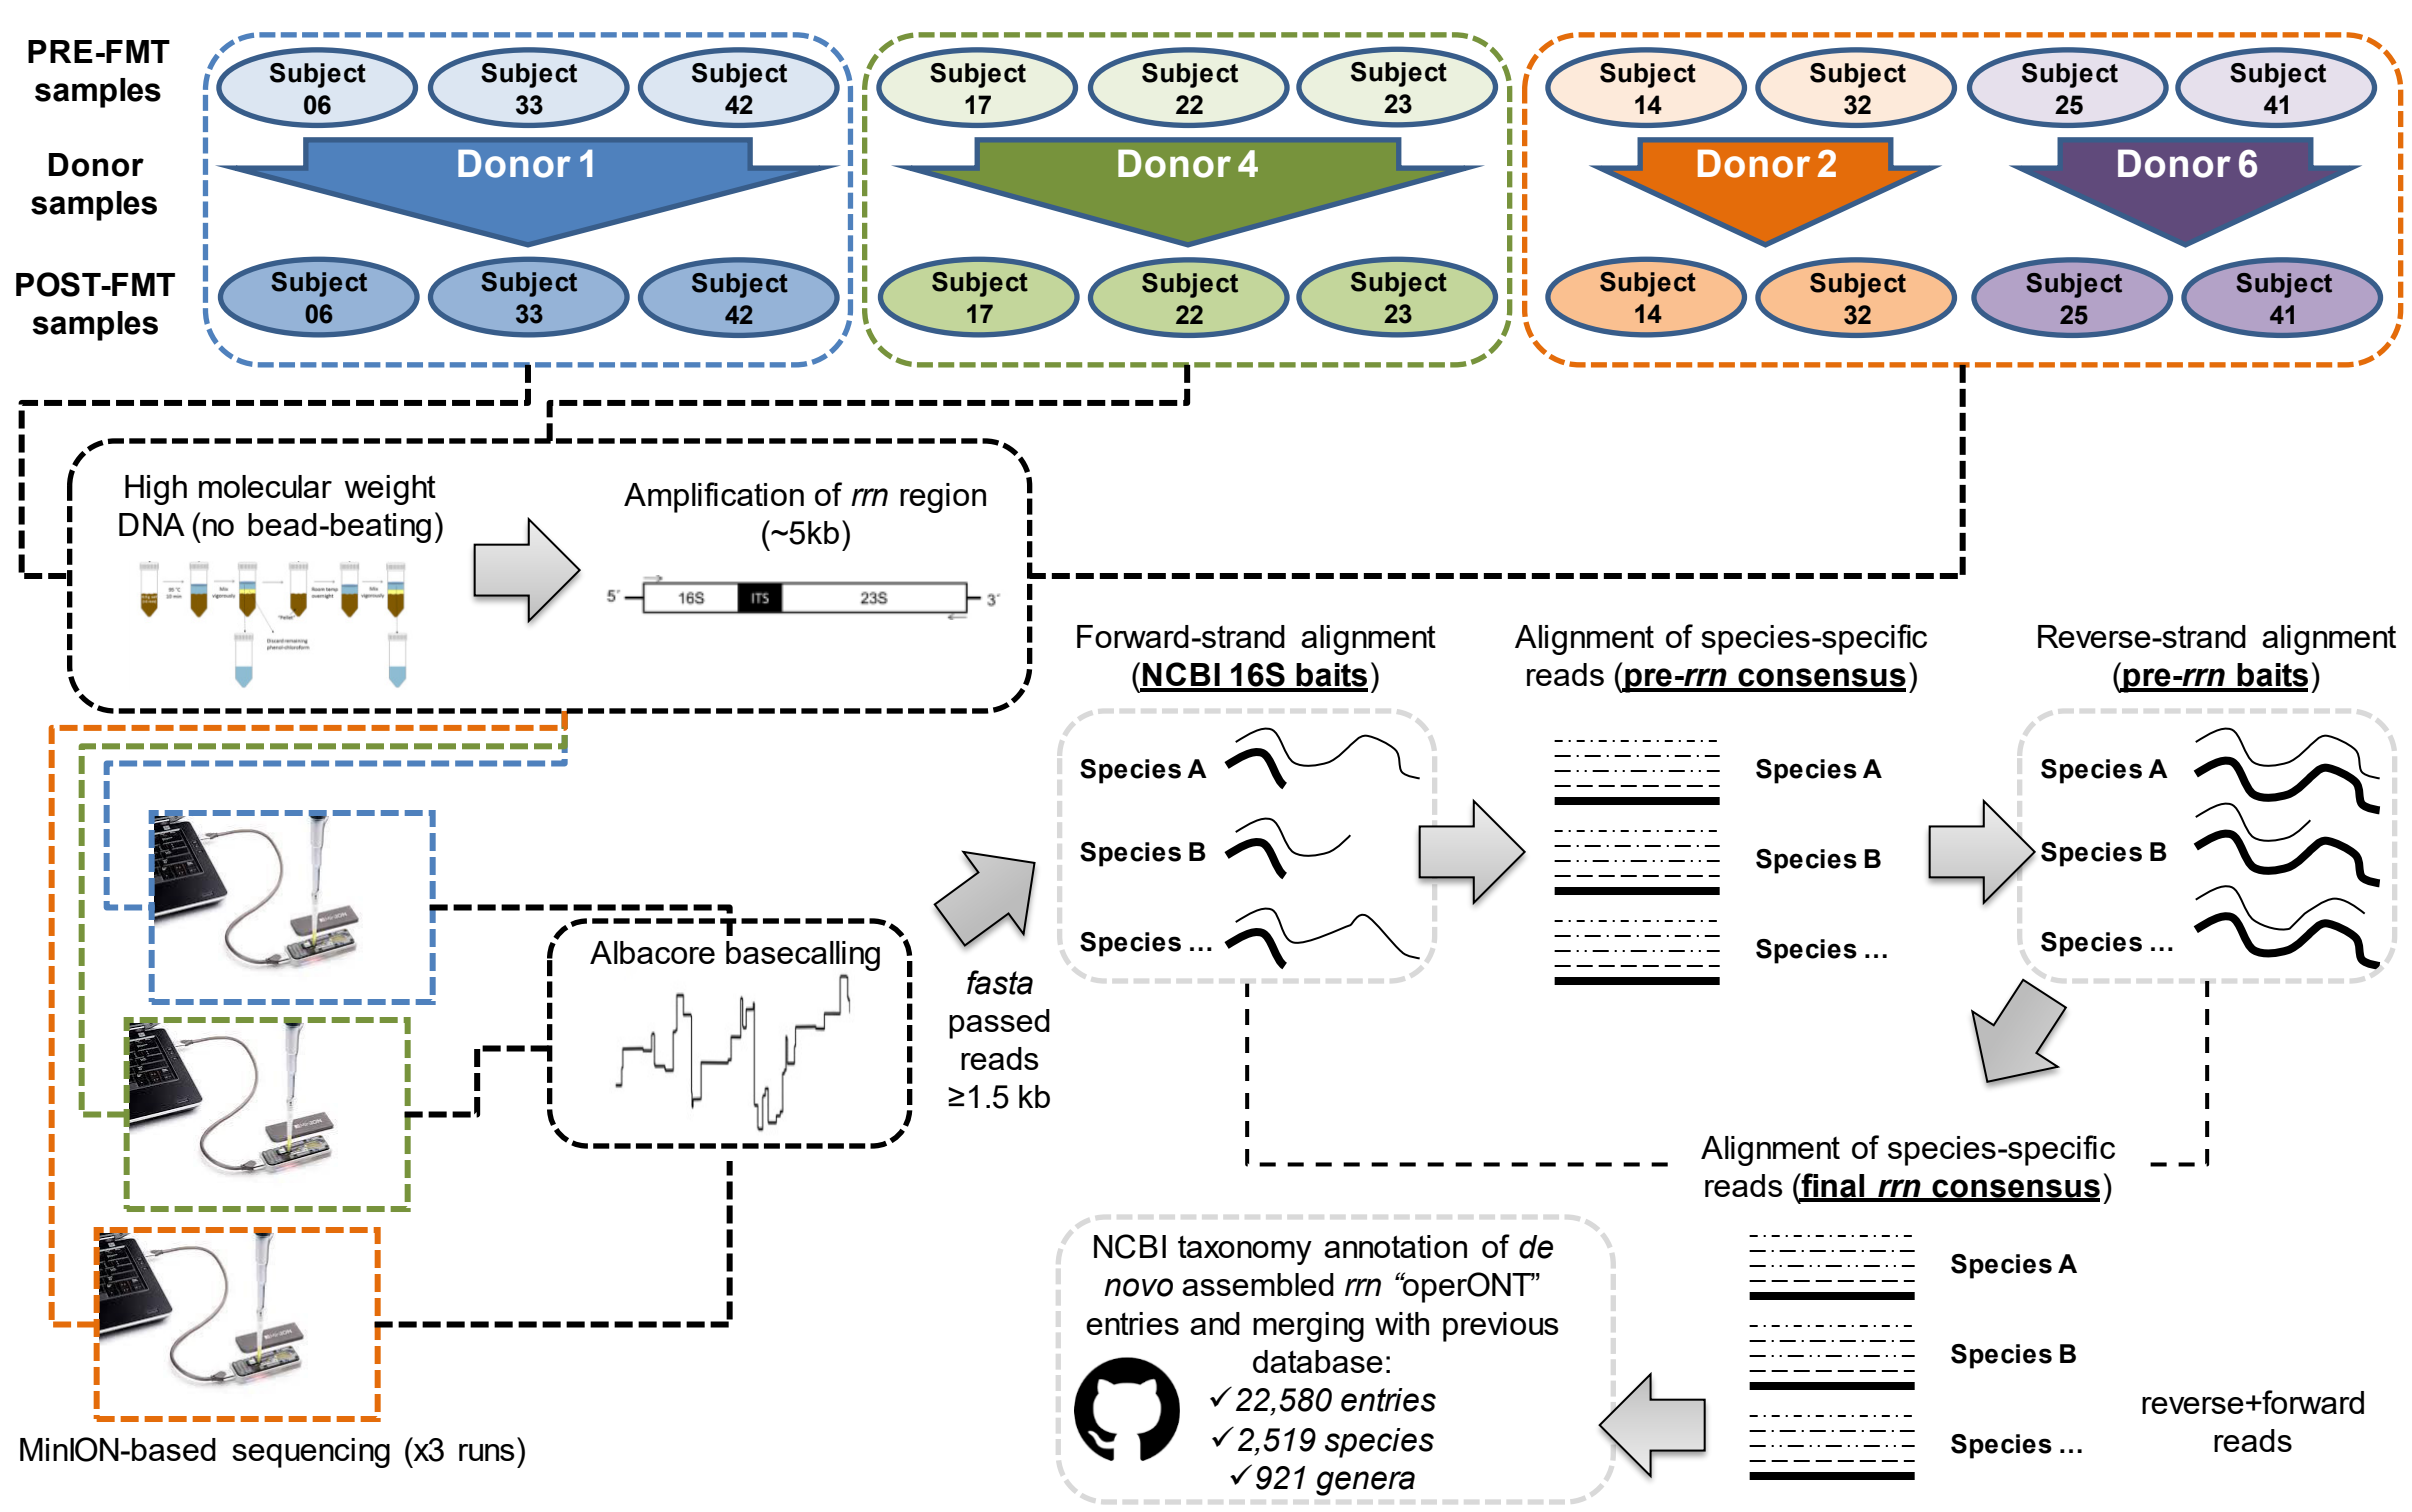

## Forward read mapping (against non-redundant NCBI 16S database)

## Reverse read mapping (against forward-read-based *rrn* assemblies)

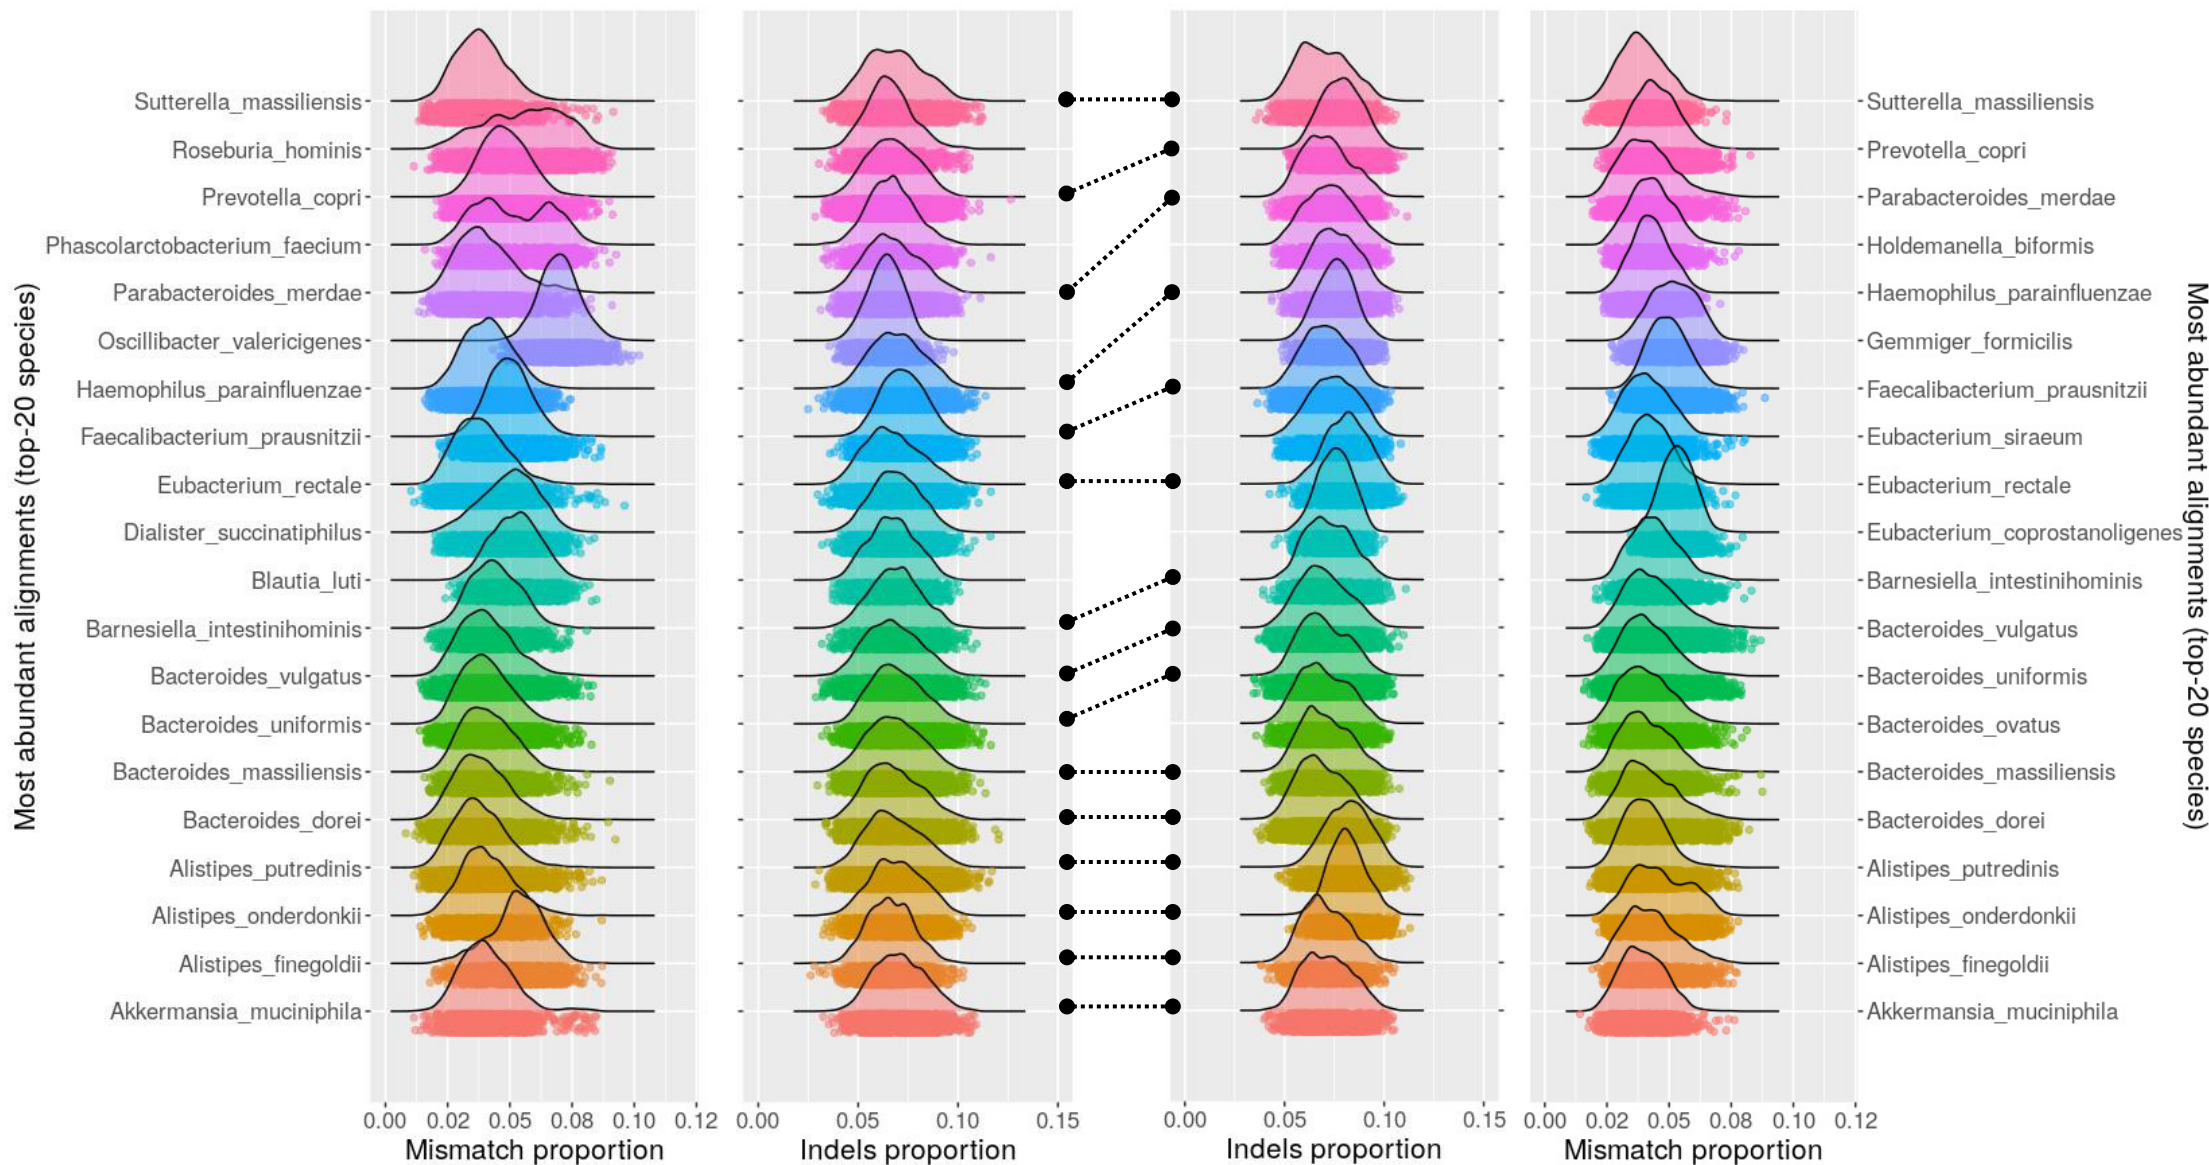



**A**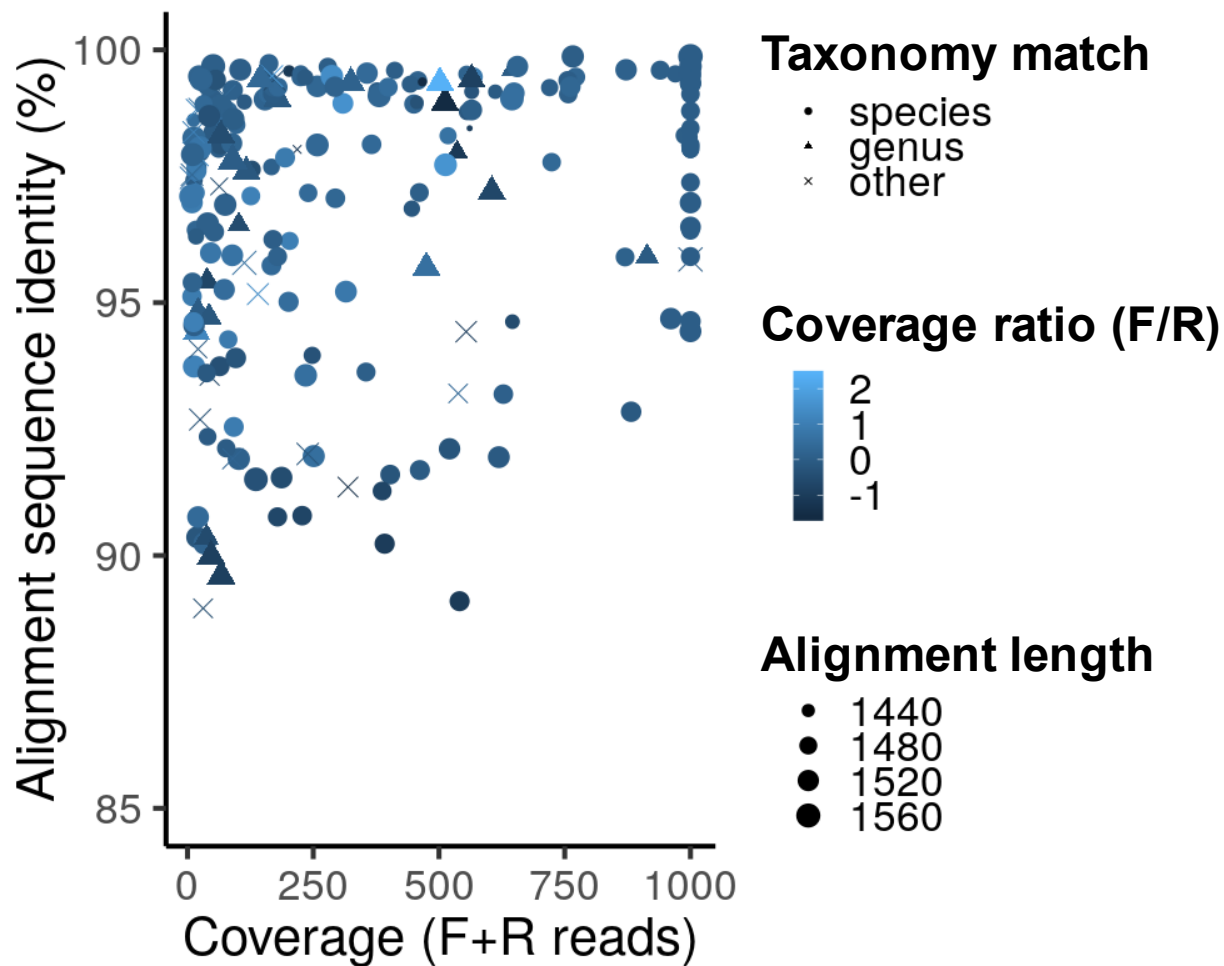**B**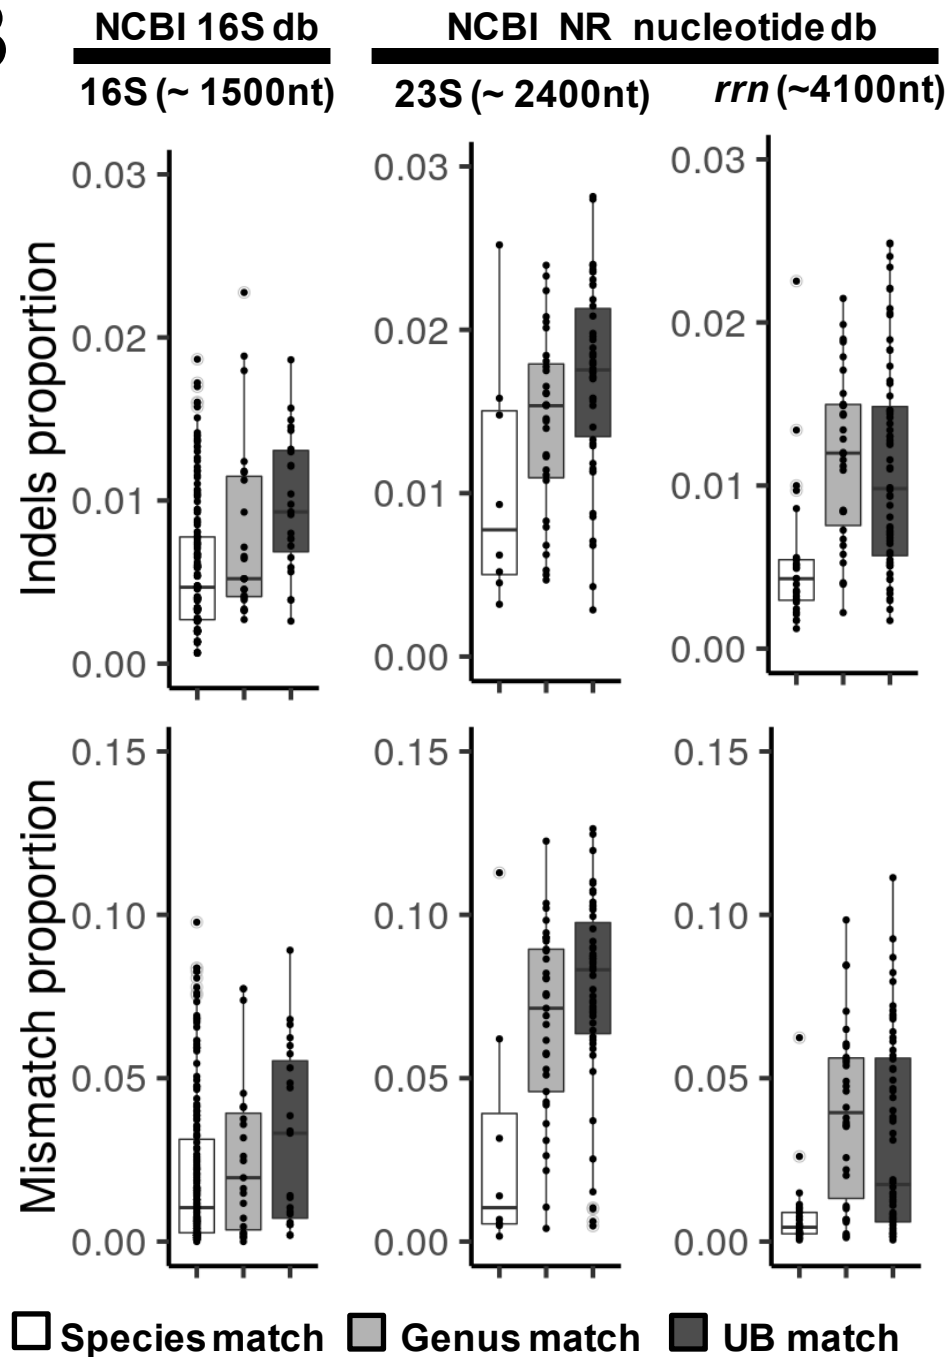

**A**

- Recipients' PRE-FMT samples
- Recipients' POST-FMT samples
- Donors' samples

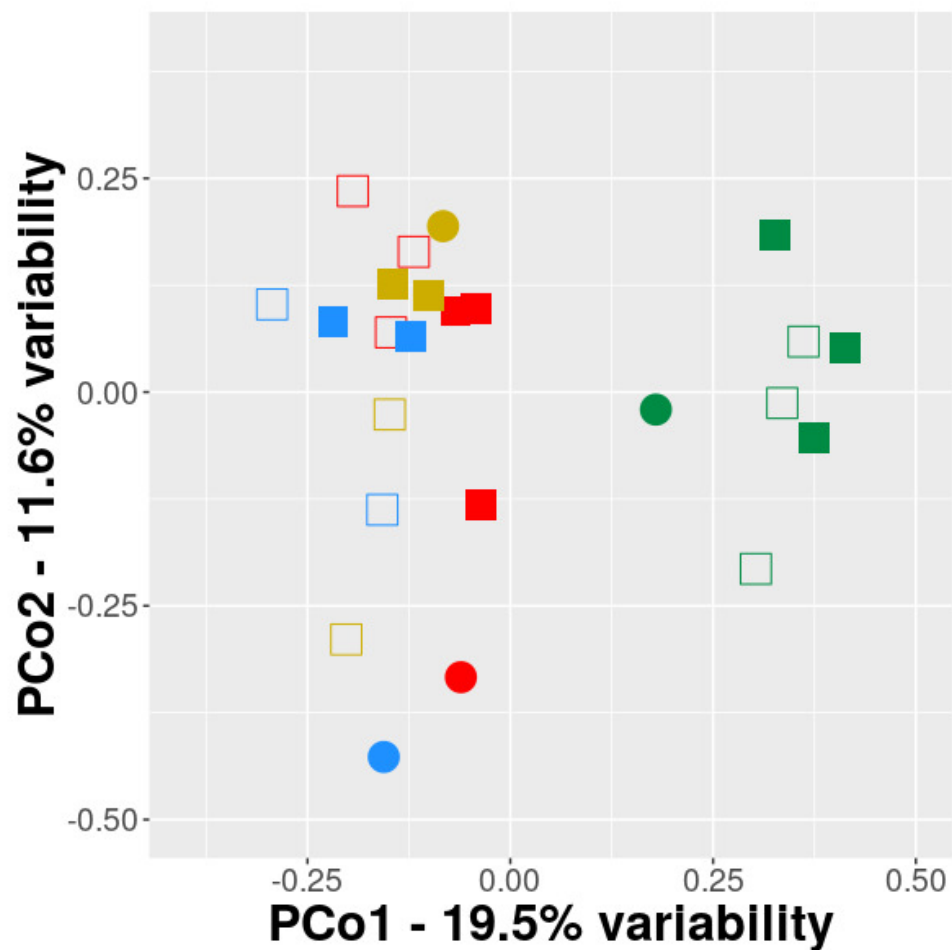**B**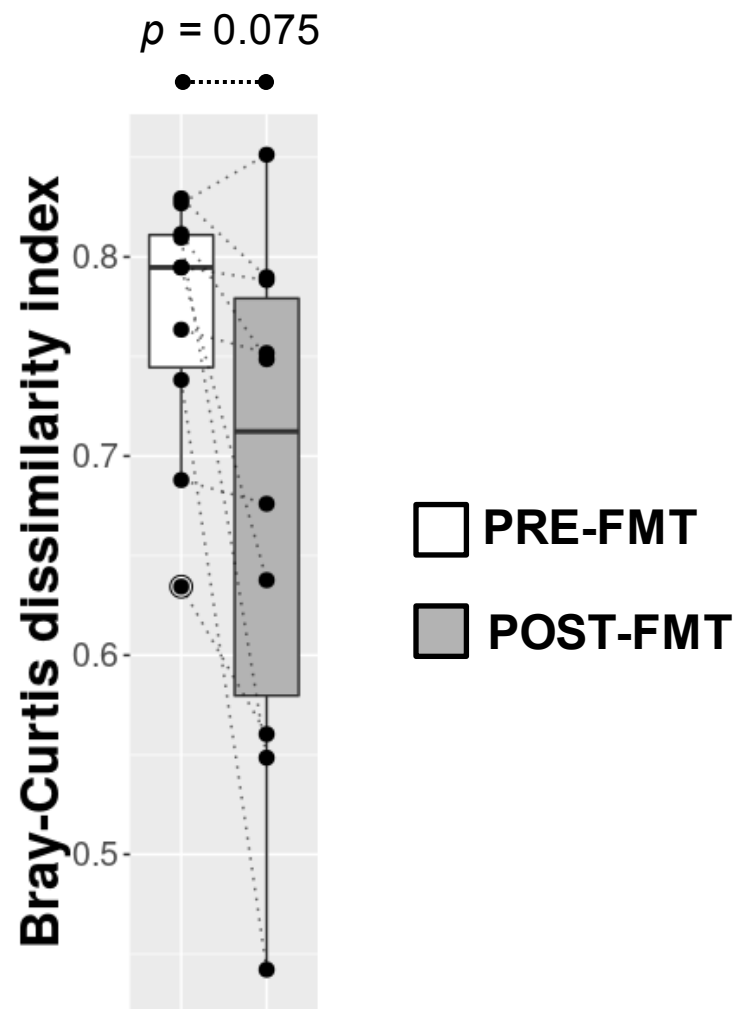

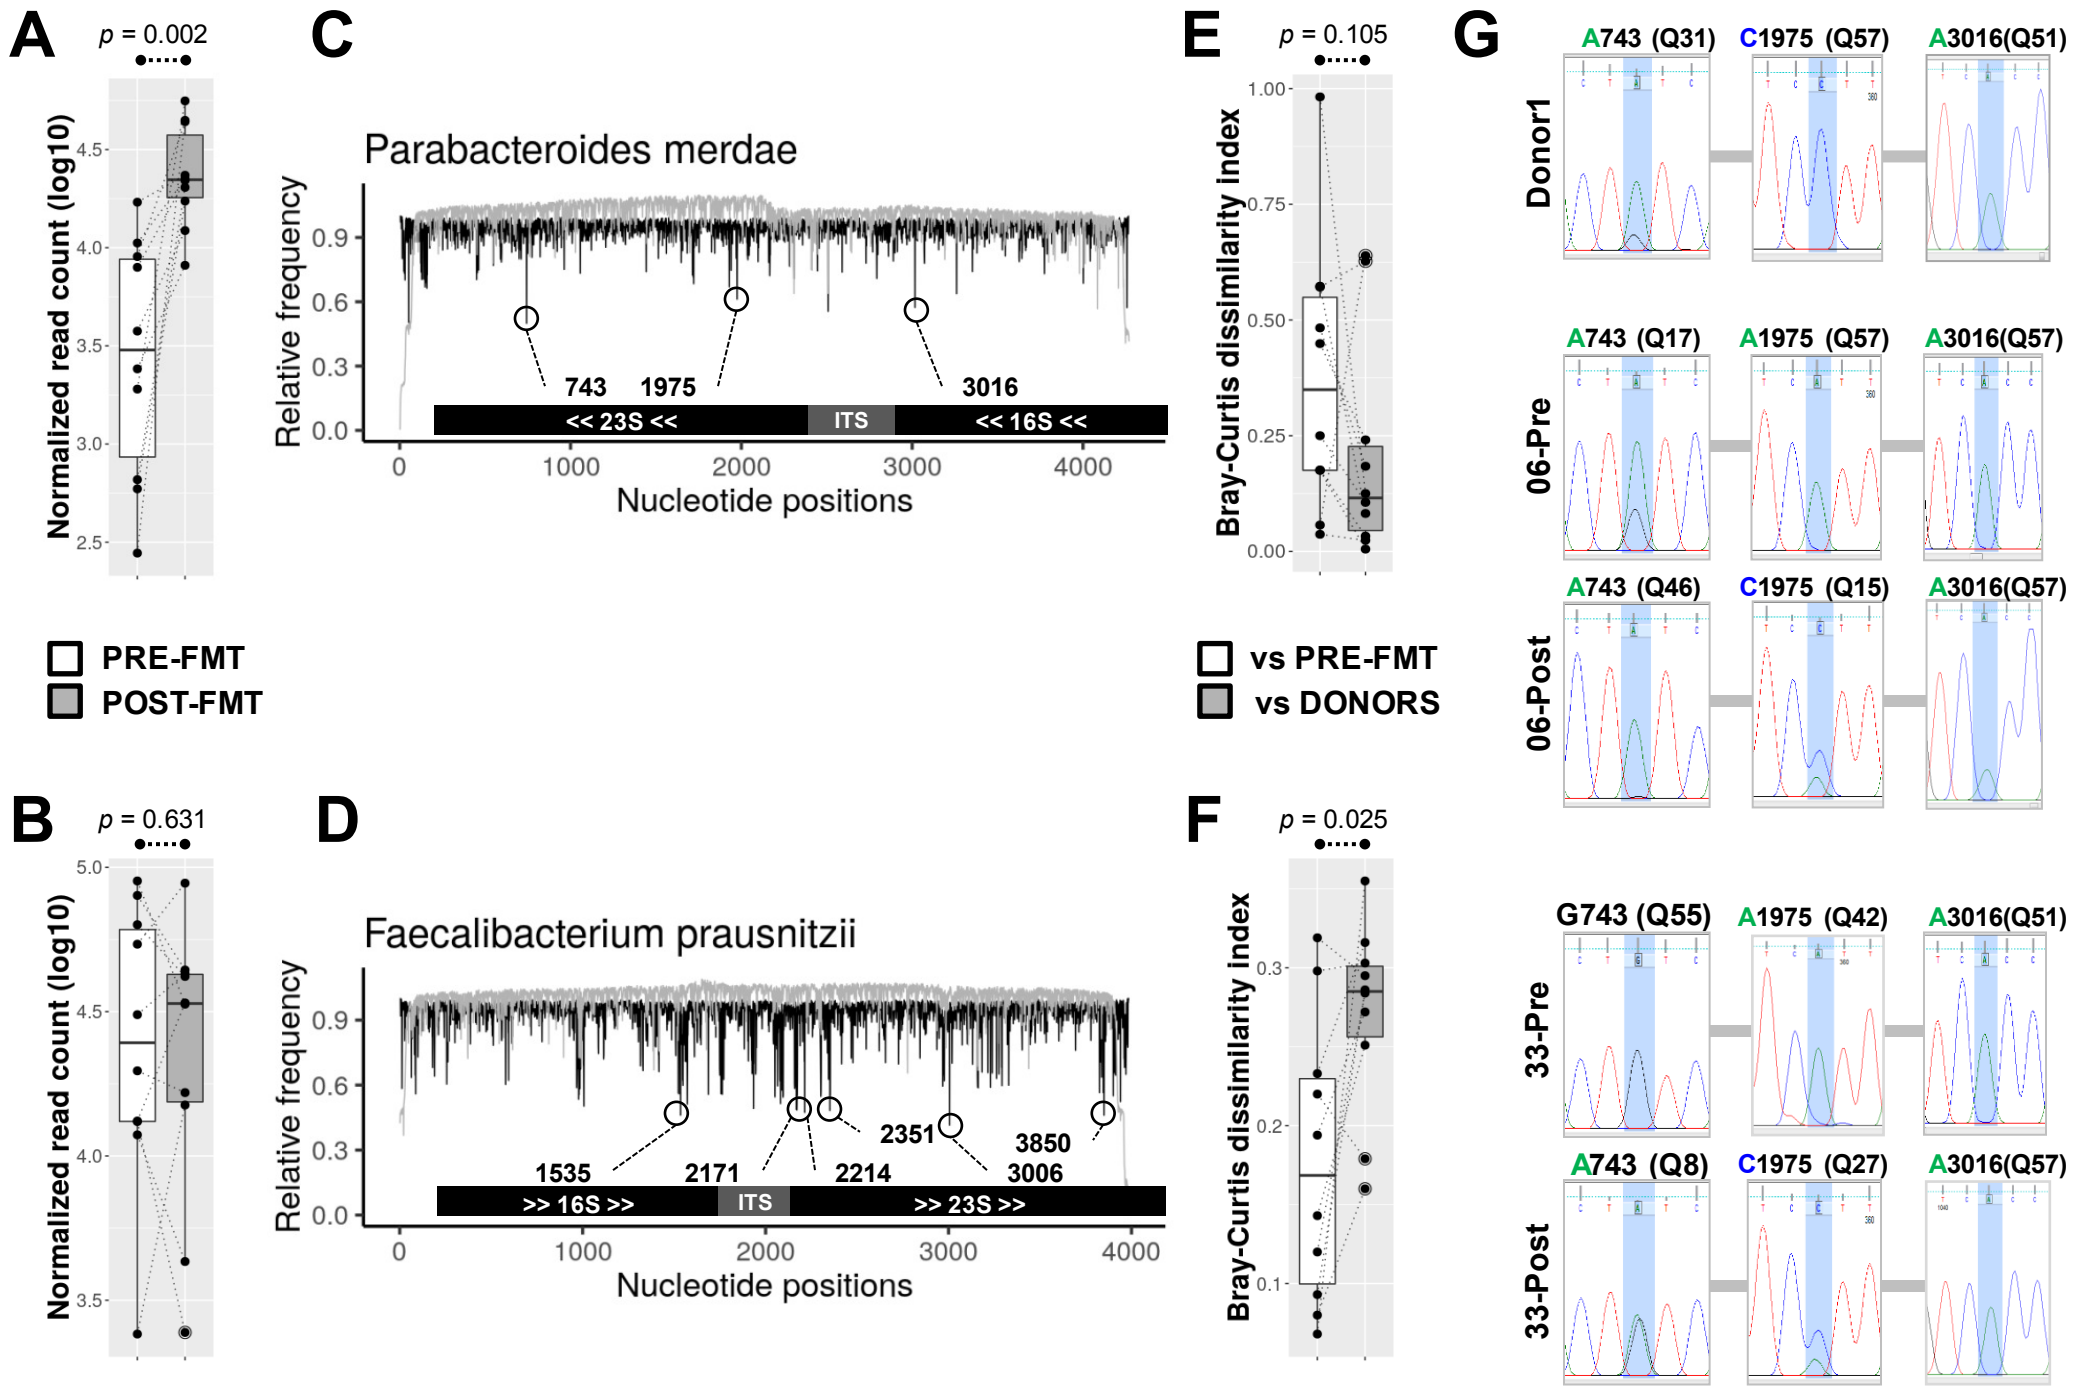

Source: https://www.biorxiv.org/content/10.1101/2020.09.11.292896v1.full.pdf
